# Supplementary material
Source: publisher figshare collection journal article supplement (https://karger.figshare.com/ndownloader/files/13525433)
Supplement: Supplementary file 1 [file 13525433]

| Supplementary Table 1. Characteristics of individuals with and without incident albuminuria | | | |
| --- | --- | --- | --- |
| Characteristics | Without albuminuria | With albuminuria | *P*-value |
| N | 47,796 | 305 |  |
| SMI | 42.2 ± 3.8 | 41.7 ± 3.9 | 0.029 |
| Age (years) | 39.2 ± 5.8 | 38.7 ± 5.7 | 0.120 |
| Male gender | 34,154 (71.5) | 241 (79.0) | 0.004 |
| BMI (kg/m2) | 23.6 ± 3.2 | 25.0 ± 3.7 | < 0.001 |
| SBP (mmHg) | 108 ± 12 | 113 ± 13 | < 0.001 |
| DBP (mmHg) | 71 ± 10 | 74 ± 10 | < 0.001 |
| Glucose (mg/dl) | 96 ± 13 | 101 ± 25 | < 0.001 |
| TC (mg/dl) | 196 ± 34 | 199 ± 34 | 0.051 |
| LDL cholesterol (mg/dl) | 123 ± 31 | 126 ± 32 | 0.111 |
| Triglyceride (mg/dl) | 100 (70–148) | 116 (79–175) | < 0.001 |
| HOMA-IR | 1.26 (0.82–1.88) | 1.65 (0.96–2.36) | < 0.001 |
| hsCRP (mg/dl) | 0.04 (0.02–0.09) | 0.06 (0.03–0.12) | < 0.001 |
| Albumin (mg/dl) | 4.57 ± 0.23 | 4.60 ± 0.26 | 0.029 |
| eGFR (ml/min/1.73 m2) | 98.2 ± 13 | 97.2 ± 14 | 0.161 |
| Uric acid (mg/dl) | 5.6 ± 1.4 | 5.9 ± 1.5 | < 0.001 |
| Education* | 41,000 (85.8) | 262 (85.9) | 0.952 |
| Hypertension | 4,996 (10.5) | 68 (22.3) | < 0.001 |
| Diabetes | 1,488 (3.1) | 26 (8.5) | < 0.001 |
| Alcohol intake† | 22,327 (46.7) | 155 (50.8) | 0.152 |
| Current smoker | 12,938 (27.1) | 106 (34.8) | 0.003 |
| Exercise‡ | 6,776 (14.2) | 47 (15.4) | 0.538 |
| Values for categorical variables are reported as the number (percentage) and for continuous variables, as the mean ± standard deviation or median [interquartile range].  *College diploma or more, †Alcohol intake ≥ 10 g of ethanol per day, ‡Vigorous exercise three or more times per week.  SMI, skeletal muscle mass index; BMI, body mass index; SBP, systolic blood pressure; DBP, diastolic blood pressure; TC, total cholesterol; LDL, low-density lipoprotein; HOMA-IR, homeostasis model assessment of insulin resistance; hsCRP, high-sensitivity C-reactive protein; eGFR, estimated glomerular filtration rate. | | | |

| Supplementary Table 2. Association between sarcopenia and incident albuminuria in clinically relevant subgroups | | | |
| --- | --- | --- | --- |
| Subgroup | OR (95% CI) | *P*-value | *P*-value for interaction |
| Age (years) |  |  | 0.762 |
| <40 (n = 24,612) | 1.30 (0.87-1.95) | 0.193 |  |
| ≥40 (n = 23,489) | 1.53 (1.00-2.34) | 0.051 |  |
| Sex |  |  | 0.591 |
| Female (n = 13,706) | 1.09 (0.51-2.34) | 0.817 |  |
| Male (n = 34,395) | 1.48 (1.07-2.03) | 0.017 |  |
| BMI |  |  | 0.251 |
| < 23.5 kg/m2 (n = 24,338) | 0.82 (0.25-2.65) | 0.740 |  |
| ≥ 23.5 kg/m2 (n = 23,763) | 1.51 (1.10-2.06) | 0.010 |  |
| Hypertension or diabetes |  |  | 0.678 |
| No (n = 42,060) | 1.35 (0.94-1.93) | 0.107 |  |
| Yes (n = 6,041) | 1.41 (0.85-2.33) | 0.182 |  |
| Smoking |  |  | 0.312 |
| No (n = 35,057) | 1.35 (0.93-1.98) | 0.117 |  |
| Yes (n = 13,044) | 1.46 (0.93-2.30) | 0.099 |  |
| Exercise* |  |  | 0.412 |
| No (n = 41,278) | 1.43 (1.05-1.96) | 0.023 |  |
| Yes (n = 6,823) | 1.29 (0.54-3.07) | 0.564 |  |
| hsCRP |  |  | 0.108 |
| < 0.05 mg/dl (n = 24,710) | 0.91 (0.45-1.84) | 0.794 |  |
| ≥ 0.05 mg/dl (n = 23,391) | 1.47 (1.05-2.06) | 0.023 |  |
| *Vigorous exercise three or more times per week.  Adjusted for age, gender, BMI, education level, hypertension, diabetes, dyslipidemia, eGFR, albumin, hsCRP, HOMA-IR, current smoking, alcohol intake, and vigorous exercise frequency.  SMI, skeletal muscle mass index; CI, confidence interval; BMI, body mass index; eGFR, estimated glomerular filtration rate; hsCRP, high-sensitivity C-reactive protein; HOMA-IR, homeostatic model assessment of insulin resistance. | | | |
